1 Seroprevalence of SARS-CoV-2 specific IgG antibodies in District Srinagar, northern India – a  
2 cross-sectional study  
3 S Muhammad Salim Khan,<sup>1</sup> Mariya Amin Qurieshi,<sup>1</sup> Inaamul Haq,<sup>1\*</sup> Sabhiya Majid,<sup>2</sup> Arif Akbar  
4 Bhat,<sup>2</sup> Sahila Nabi,<sup>1</sup> Nisar Ahmad Ganai,<sup>1</sup> Nazia Zahoor,<sup>1</sup> Auqfeen Nisar,<sup>1</sup> Iqra Nisar Chowdri,<sup>1</sup>  
5 Tanzeela Bashir Qazi,<sup>1</sup> Rafiya Kousar,<sup>1</sup> Abdul Aziz Lone,<sup>1</sup> Iram Sabah,<sup>1</sup> Shahroz Nabi,<sup>1</sup> Ishtiyag  
6 Ahmad Sumji,<sup>1</sup> Misbah Ferooz Kawoosa,<sup>1</sup> Shifana Ayoub<sup>1</sup>

7 <sup>1</sup>Department of Community Medicine, Government Medical College Srinagar, Srinagar-190010,  
8 India, <sup>2</sup>Department of Biochemistry, Government Medical College Srinagar, Srinagar-190010,  
9 India

10 \*Corresponding author

11 Inaamul Haq, MD

12 Assistant Professor

13 Department of Community Medicine

14 Government Medical College, Srinagar

15 Srinagar – 190010

16 Jammu & Kashmir, India

17 Phone: +91-9419467279, +91-7780938948

18 Email: [haqinaam@yahoo.co.in](mailto:haqinaam@yahoo.co.in)

19

## 20 **Abstract**

21 Background: Prevalence of IgG antibodies against SARS-CoV-2 infection provides essential  
22 information for deciding disease prevention and mitigation measures. We estimate the  
23 seroprevalence of SARS-CoV-2 specific IgG antibodies in District Srinagar.

24 Methods: 2906 persons >18 years of age selected from hospital visitors across District Srinagar  
25 participated in the study. We tested samples for the presence of SARS-CoV-2 specific IgG  
26 antibodies using a chemiluminescent microparticle immunoassay-based serologic test.

27 Results: Age- and gender-standardized seroprevalence was 3.6% (95% CI 2.9% to 4.3%). Age  
28 30-69 years, a recent history of symptoms of an influenza-like-illness, and a history of being  
29 placed under quarantine were significantly related to higher odds of the presence of SARS-CoV-  
30 2 specific IgG antibodies. The estimated number of SARS-CoV-2 infections during the two  
31 weeks preceding the study, adjusted for test performance, was 32602 with an estimated (median)  
32 infection-to-known-case ratio of 46 (95% CI 36 to 57).

33 Conclusions: The seroprevalence of SARS-CoV-2 specific IgG antibodies is low in the District.  
34 A large proportion of the population is still susceptible to the infection. A sizeable number of  
35 infections remain undetected, and a substantial proportion of people with symptoms compatible  
36 with COVID-19 are not tested.

37 Keywords: SARS-CoV-2, COVID-19, Immunoglobulin G, Seroprevalence.

38

## 39 **Introduction**

40 Coronavirus disease (COVID-19) is an infectious disease caused by the most recently discovered  
41 coronavirus, Severe Acute Respiratory Syndrome Coronavirus 2 (SARS-CoV-2) [1]. The disease  
42 was declared as a Public Health Emergency of International Concern and later as a global  
43 pandemic by the World Health Organization [2,3]. COVID-19 presents with flu-like symptoms  
44 and causes severe symptoms in some cases. As of 31<sup>st</sup> July 2020, there were over 17 million  
45 reported cases of SARS-CoV-2 infection, with nearly 669 thousand deaths globally [4]. In India,  
46 as of 31<sup>st</sup> July 2020, the total number of reported SARS-CoV-2 infections was over 1.6 million,  
47 with more than 35 thousand deaths [4]. In District Srinagar, the first case of SARS-CoV-2  
48 infection was reported on 18<sup>th</sup> March 2020. On 22<sup>nd</sup> March 2020, the Jammu and Kashmir  
49 government ordered the shutdown of all non-essential activities, commercial and business  
50 establishments, and educational institutions, except essential commodities and services to  
51 prevent the spread of SARS-CoV-2 infection [5]. The health authorities started extensive case-  
52 detection and contact-tracing activities. Case-detection was based on the testing of  
53 nasopharyngeal samples by reverse transcriptase-polymerase chain reaction (RT-PCR).

54 People with SARS-CoV-2 infection may remain asymptomatic or develop mild to severe  
55 COVID-19, which may result in death. A large proportion of SARS-CoV-2 infections remain  
56 asymptomatic and contribute to disease transmission [6,7]. Testing strategy and the number of  
57 test kits available influences the detection of cases by RT-PCR. RT-PCR-based case detection  
58 strategies may not provide a reasonable approximation of the number of SARS-CoV-2 infections  
59 in a population since they may miss many asymptomatic and pre-symptomatic infections. Thus,

60 an informed policy- and decision-making for control of the COVID-19 epidemic in a community  
61 should not be based solely on RT-PCR-based numbers.

62 Seroprevalence surveys can provide an estimate of the proportion of the population that has  
63 developed antibodies against SARS-CoV-2, an indication of recent SARS-CoV-2 infection. Mild  
64 and asymptomatic infections, which may not have received RT-PCR testing, can be detected.  
65 Besides, assuming that antibodies provide partial or total immunity, seroprevalence surveys give  
66 an estimation of the proportion of the population still susceptible to the infection. Seroprevalence  
67 studies provide important complementary information to frame evidence-based strategies for  
68 SARS-CoV-2 infection prevention.

69 Here, we present the results of a cross-sectional seroprevalence study in District Srinagar,  
70 conducted between 1<sup>st</sup> and 15<sup>th</sup> July 2020, to estimate the prevalence of IgG antibodies against  
71 SARS-CoV-2 among adults using a sensitive and specific chemiluminescent microparticle  
72 immunoassay (CMIA)-based test.

## 73 **Materials and methods**

### 74 **Study design, setting, and participants**

75 We conducted a cross-sectional seroprevalence study in District Srinagar over two weeks from  
76 1<sup>st</sup> July 2020 to 15<sup>th</sup> July 2020. District Srinagar is a city in the valley of Kashmir in northern  
77 India. It has an estimated adult (>18 years) population of just over one million. Study  
78 participants were adults (>18 years) who visited select hospitals across the District during the  
79 study period.

### 80 **Ethics statement**

81 We informed the participants of the study's purpose and procedure. We obtained written  
82 informed consent from those who agreed to participate. The Institutional Ethics Committee of  
83 Government Medical College Srinagar approved the study.

## 84 **Sample size**

85 We estimated the minimum sample size needed based on an anticipated seroprevalence of 2%  
86 within an absolute error of 0.8% with 95% confidence. We used a design effect of 2 to adjust for  
87 the nature of sampling and increased the sample size further to account for a non-response of  
88 20%. The minimum sample size needed for the study was 2821. We targeted a sample size of  
89 3000.

## 90 **Selection of participants**

91 There are 130 hospitals across District Srinagar which provide primary, secondary, and tertiary  
92 care to the populace. We purposively selected 20 hospitals across the District so that the chosen  
93 hospitals spread across all areas of the District. Furthermore, hospitals with very meager patient  
94 visits (specifically, we excluded hospitals with less than 100 patient visits per month) were not  
95 selected. Details about the hospitals across the District are in the supplementary material (S1  
96 Data).

97 We deemed hospital-based selection of participants to be more convenient, rapid, and feasible,  
98 given the constrained human resources and time available for completion of the study. Such a  
99 choice could, however, lead to a non-representative sample. We made efforts to reduce this bias  
100 by reporting age- and gender-standardized prevalence.

101 We invited all adult patients (>18 years) coming to the selected hospitals during the study period  
102 for participation in the study.

## 103 **Procedure**

104 Consenting adults were required to answer a set of questions which included information about  
105 demographic variables, self-reported history of contact with a known SARS-CoV-2 positive  
106 patient, self-reported history of travel outside the valley since 1<sup>st</sup> January 2020, history of  
107 symptoms suggestive of an Influenza-Like Illness (ILI) (Fever and Cough) during the two weeks  
108 preceding the interview, history of an RT-PCR for SARS-CoV-2 infection and the result of such  
109 a test, if done. Each participant was assigned a five-digit unique identification number.

110 Participants were interviewed by doctors who had training and experience in conducting survey  
111 interviews and were specifically trained to use the EpiCollect5 platform for recording and  
112 uploading the responses. EpiCollect5 is a free, mobile application-based tool which enables the  
113 interviewers to record and store the participant responses offline and upload them to the  
114 EpiCollect5 server from where stored data is downloaded for data analysis [8].

115 Upon completion of the interview, trained laboratory technicians (phlebotomists) collected 3-5  
116 mL of venous blood from each participant under standard aseptic precautions. The blood samples  
117 were immediately transferred into a red-top serum tube with a clot activator. The samples were  
118 allowed to stand for at least 30 minutes for clotting to take place. Afterward, the samples were  
119 centrifuged at the same hospital at 3000 RPM for 10 minutes. In case the centrifugation facility  
120 was not available at the hospital, centrifugation was done at a central facility. Centrifuged blood  
121 samples were transported under the cold chain to a central laboratory for further processing and

122 testing. The samples were carefully packed in designated vaccine carriers to avoid hemolysis  
123 during transportation.

## 124 **Laboratory procedure**

125 We performed the test med using Fully Automated High Throughput Platform ARCHITECT  
126 i1000SR Immunoassay Analyzer by Abbott Laboratories Inc[9]. Before testing, calibration was  
127 performed to create assay control. Once calibration was accepted and stored, serum samples were  
128 tested for SARS-CoV-2 specific IgG. For quality control, a single sample of each control level was  
129 tested once every 24 hours. The SARS-CoV-2 IgG assay uses chemiluminescent microparticle  
130 immunoassay (CMIA) technology to detect IgG antibodies to SARS-CoV-2 in human serum and  
131 plasma. The test has a high sensitivity (100%) and specificity (over 99.6%) for the detection of  
132 SARS-CoV-2 specific IgG antibodies 17 days after infection [9,10].

## 133 **Laboratory data entry**

134 Separate EpiCollect5 forms, in duplicate, were used for entering laboratory results data. The  
135 forms were independently filled by two trained personnel. Data from the two forms were  
136 checked for consistency by a third person and in case of any discrepancy, the source data was  
137 referred for any needed correction. The unique identification number was used to link the  
138 interview information and laboratory results data.

## 139 **Definitions used**

140 Participants were labeled as “IgG positive” if the index value for SARS-CoV-2 specific IgG was  
141 above 1.40, as suggested by the manufacturer [9]. Else, they were labeled “IgG negative”.

## 142 **Statistical analysis**

143 For the presentation of age data, age was grouped into 20-year age intervals. The occupation was  
144 categorized as ‘at-risk occupation’ and ‘low-risk occupation’ depending upon the perceived risk  
145 of exposure to a known or unknown SARS-COV-2 positive case. Categorical variables were  
146 summarized as frequency and percentage. Overall, unadjusted seroprevalence was reported as a  
147 percentage along with its 95% confidence interval. Given the nature of participant selection, we  
148 report age- and gender-standardized seroprevalence to minimize, if not nullify, the resultant bias.  
149 The Sample Registration System (SRS) Statistical Report 2018 [11] provides the latest available  
150 percentage distribution of the population of Jammu & Kashmir by age and gender. We used  
151 figures for urban areas in the report to calculate weights for reporting age- and gender-  
152 standardized seroprevalence. The details are in the supplementary material (S1 Table).

153 To identify potential factors associated with SARS-CoV-2 seropositivity, we used logistic  
154 regression analysis and reported unadjusted and age- and gender-adjusted odds ratio with a 95%  
155 confidence interval.

156 We estimated the number of infections till two weeks before the study period, i.e., 15<sup>th</sup> June 2020  
157 to 30<sup>th</sup> June 2020, by applying the age- and gender-specific seroprevalence rates found in the  
158 study to the projected population of the District for the year 2020 using 2011 census data [12]  
159 and growth rates from the Sample Registration System (SRS) [13]. Details are in the  
160 supplementary material (S2 Table).

161 Stata version 15.1 (StataCorp. 2017. Stata Statistical Software: Release 15. College Station, TX:  
162 StataCorp LLC.) was used for data analysis.



## 163 **Results**

164 Over the study period, 3031 eligible persons were invited for participation in the study. The  
165 refusal rate was 3.6% (108/3031). Two thousand nine hundred twenty-three blood samples were  
166 collected, but demographic data was missing for 17 participants. We analyzed data from 2906  
167 participants (Fig. 1).

168 **Fig 1. Flowchart of participants' recruitment.**

169

170 Only 90/2906 (3.1%) of the participants were  $\geq 70$  years of age. There was almost equal  
171 representation from males and females. Among females, 475/1443 (32.9%) were pregnant at the  
172 time of the interview. 115/2906 (4.0%) reported ILI symptoms in the four weeks preceding the  
173 interview, 141/2906 (4.9%) reported having contact with a known SARS-CoV-2 positive case,  
174 361/2906 (12.4%) had been tested for SARS-CoV-2 infection using RT-PCR, and 91/2906  
175 (3.1%) had been placed under quarantine (Table 1).

176 **Table 1. Seroprevalence of SARS-CoV-specific IgG antibodies by participant**  
177 **characteristics**

| <b>Participant characteristics</b> | <b>Number of participants</b> | <b>Number of participants</b> | <b>Seroprevalence (95% CI)</b>                    |
|------------------------------------|-------------------------------|-------------------------------|---------------------------------------------------|
|                                    |                               | <b>IgG Positive</b>           |                                                   |
| Overall                            | 2906                          | 111                           | 3.8% (3.2 – 4.6)<br>3.6% (2.9 – 4.3) <sup>a</sup> |

|                                            |      |    |                    |
|--------------------------------------------|------|----|--------------------|
| <b>Age (years)</b>                         |      |    |                    |
| <30                                        | 836  | 17 | 2.0% (1.3 – 3.2)   |
| 30-49                                      | 1424 | 59 | 4.1% (3.2 – 5.3)   |
| 50-69                                      | 556  | 32 | 5.8% (4.1 – 8.0)   |
| ≥70                                        | 90   | 3  | 3.3% (1.1 – 9.8)   |
| <b>Gender</b>                              |      |    |                    |
| Male                                       | 1463 | 63 | 4.3% (3.4 – 5.5)   |
| Female                                     | 1443 | 48 | 3.3% (2.5 – 4.4)   |
| <b>Pregnant</b>                            |      |    |                    |
| Yes                                        | 475  | 11 | 2.3% (1.3 – 4.1)   |
| No                                         | 968  | 37 | 3.8% (2.8 – 5.2)   |
| <b>Occupation</b>                          |      |    |                    |
| Stays home                                 | 1434 | 54 | 3.8% (2.9 – 4.9)   |
| Health-care provider                       | 355  | 17 | 4.8% (3.0 – 7.6)   |
| Administrative                             | 186  | 7  | 3.8% (1.8 – 7.7)   |
| Essential services                         | 179  | 9  | 5.0% (2.6 – 9.4)   |
| Shopkeeper                                 | 132  | 7  | 5.3% (2.5 – 10.7)  |
| Laborer                                    | 97   | 2  | 2.1% (0.5 – 7.9)   |
| Media                                      | 44   | 0  | -                  |
| Hotel staff                                | 37   | 4  | 10.8% (4.1 – 25.5) |
| Others                                     | 442  | 11 | 2.5% (1.4 – 4.4)   |
| <b>ILI symptoms in the last four weeks</b> |      |    |                    |
| Yes                                        | 115  | 14 | 12.2% (7.3 – 19.5) |

|                                                          |      |     |                   |
|----------------------------------------------------------|------|-----|-------------------|
| No                                                       | 2791 | 97  | 3.5% (2.9 – 4.2)  |
| <hr/>                                                    |      |     |                   |
| Any comorbidity                                          |      |     |                   |
| Yes                                                      | 622  | 24  | 3.7% (2.5 – 5.5)  |
| No                                                       | 2173 | 87  | 3.8% (3.1 – 4.7)  |
| <hr/>                                                    |      |     |                   |
| History of travel outside Kashmir since 1 <sup>st</sup>  |      |     |                   |
| January 2020                                             |      |     |                   |
| Yes                                                      | 104  | 4   | 3.8% (1.5 – 9.8)  |
| No                                                       | 2802 | 107 | 3.8% (3.2 – 4.6)  |
| <hr/>                                                    |      |     |                   |
| History of contact with a known SARS-CoV-2 positive case |      |     |                   |
| Yes                                                      | 141  | 8   | 5.7% (2.9 – 10.9) |
| No                                                       | 2765 | 103 | 3.7% (3.1 – 4.5)  |
| <hr/>                                                    |      |     |                   |
| Ever tested for SARS-CoV-2 infection by                  |      |     |                   |
| RT-PCR                                                   |      |     |                   |
| Yes                                                      | 361  | 21  | 5.8% (3.8 – 8.8)  |
| No                                                       | 2545 | 90  | 3.5% (2.9 – 4.3)  |
| <hr/>                                                    |      |     |                   |
| Ever put under quarantine                                |      |     |                   |
| Yes                                                      | 91   | 8   | 8.8% (4.5 – 16.6) |
| No                                                       | 2815 | 103 | 3.7% (3.0 – 4.4)  |

178 <sup>a</sup> Age-and gender-standardized seroprevalence

179 Of 135 participants who reported symptoms compatible with COVID-19 since the four weeks  
 180 preceding the interview (including any current symptoms), only 38 (28.1%) were tested by RT-  
 181 PCR. Among asymptomatic, 97/2771 (3.5%) were IgG positive (Table 2).

182 **Table 2. Status of RT-PCR testing and seropositivity by COVID-19 compatible symptoms**

|              |          | Ever symptomatic <sup>a</sup> | Never symptomatic <sup>a</sup> |
|--------------|----------|-------------------------------|--------------------------------|
|              |          | (n=135)                       | (n=2771)                       |
| Tested by    | Yes      | 38 (28.1%)                    | 323 (11.7%)                    |
| RT-PCR       | No       | 97 (71.9%)                    | 2448 (88.3%)                   |
| SARS-CoV-2   | Positive | 14 (10.4%)                    | 97 (3.5%)                      |
| specific IgG | Negative | 121 (89.6%)                   | 2674 (96.5%)                   |

183 <sup>a</sup> Refers to symptoms compatible with COVID-19 during the four weeks preceding the study  
 184 including any current symptoms

185

186 Seventy-eight participants (78/2906 = 2.7%) visited the hospital for consultation for COVID-19-  
 187 like symptoms (Table 3).

188 **Table 3. COVID-19 like symptoms reported by study participants at the time of hospital**  
 189 **visit (n=78)**

| COVID-19 like symptom | Number of participants |
|-----------------------|------------------------|
| Fever                 | 54                     |
| Cough                 | 41                     |
| Sore throat           | 27                     |
| Body aches            | 26                     |
| Shortness of breath   | 12                     |
| Running nose          | 9                      |
| Headache              | 5                      |

|          |   |
|----------|---|
| Anosmia  | 2 |
| Diarrhea | 1 |

---

190

191 Hypertension (353/2906 = 12.1%) was the most common comorbidity followed by  
192 hypothyroidism (248/2906 = 8.5%), and diabetes mellitus (164/2906 = 5.6%) (Table 4).

193 **Table 4. Comorbidities in the study participants**

| Comorbidity                      | Number of participants | Percentage |
|----------------------------------|------------------------|------------|
| Hypertension                     | 353                    | 12.1%      |
| Hypothyroidism                   | 248                    | 8.5%       |
| Diabetes mellitus                | 164                    | 5.6%       |
| Chronic obstructive lung disease | 15                     | 0.5%       |
| Coronary heart disease           | 14                     | 0.5%       |
| Chronic kidney disease           | 9                      | 0.3%       |
| Cerebrovascular disease          | 7                      | 0.2%       |
| Cancer                           | 6                      | 0.2%       |
| Chronic liver disease            | 3                      | 0.1%       |
| Other comorbidities              | 53                     | 1.8%       |
| No comorbidities                 | 2260                   | 77.8%      |

---

194

195 The overall, unadjusted prevalence of IgG antibodies against SARS-CoV-2 (seroprevalence) in  
196 the study sample was 3.8% (95% CI 3.2%-4.6%) (Table 1). The age-and gender-adjusted  
197 seroprevalence was 3.6% (95% CI 2.9%-4.3%) (S3 Table).

198 Young people, those with a history of ILI symptoms in the four weeks preceding the interview,  
 199 and those ever placed under quarantine were found to have significantly higher odds of the  
 200 presence of SARS-CoV-2 specific IgG antibodies (Table 5).

201 **Table 5. Unadjusted and age- and gender-adjusted odds ratio of seropositivity by**  
 202 **participant characteristics**

|                                                                | Unadjusted             |             | Age- and gender-adjusted |             |
|----------------------------------------------------------------|------------------------|-------------|--------------------------|-------------|
|                                                                | Odds ratio<br>(95% CI) | p-<br>value | Odds ratio<br>(95% CI)   | p-<br>value |
| Age (years)                                                    |                        |             |                          |             |
| <30                                                            | 1 (Reference)          | -           | 1 (Reference)            | -           |
| 30-49                                                          | 2.1 (1.2 - 3.6)        | 0.009       | 2.0 (1.2 - 3.5)          | 0.011       |
| 50-69                                                          | 2.9 (1.6 - 5.4)        | <0.001      | 2.8 (1.6 - 5.2)          | 0.001       |
| ≥70                                                            | 1.7 (0.5 - 5.8)        | 0.425       | 1.6 (0.5 - 5.6)          | 0.464       |
| Male                                                           | 1.3 (0.9 - 1.9)        | 0.169       | 1.2 (0.8 - 1.8)          | 0.495       |
| At-risk occupation                                             | 1.6 (1.1 - 2.4)        | 0.023       | 1.5 (1.0 - 2.3)          | 0.072       |
| ILI symptoms                                                   | 3.8 (2.1 - 7.0)        | <0.001      | 3.7 (2.0 - 6.7)          | <0.001      |
| History of contact with a<br>known SARS-CoV-2<br>positive case | 1.6 (0.7 - 3.3)        | 0.243       | 1.6 (0.7 - 3.3)          | 0.244       |
| Ever put under quarantine                                      | 2.5 (1.2 - 5.4)        | 0.015       | 2.7 (1.3 - 5.8)          | 0.011       |

203

204 During the two weeks before the start of the study (15<sup>th</sup> June 2020 to 30<sup>th</sup> June 2020), the  
205 estimated cumulative number of SARS-CoV-2 infections in the area was 36677 (95% CI 29546-  
206 43809) (S2 Table). When adjusted for sensitivity and specificity of the laboratory test kit [14],  
207 the number of infections comes down to 32602 (95% CI 25470-39734) (S2 Table).

208 The cumulative number of RT-PCR confirmed cases till 15<sup>th</sup> June 2020 was 538 in District  
209 Srinagar, and the number was 932 till 30<sup>th</sup> June 2020. The mid-interval (median) cumulative  
210 number of RT-PCR confirmed cases in the two weeks preceding the study was 703 (Fig 2). The  
211 infection-to-known-case ratio was thus between  $32602/932=35$  (95% CI  $25470/932=27$  to  
212  $39734/932=43$ ) to  $32602/538=61$  (95% CI  $25470/538=47$  to  $39734/538=74$ ). The median  
213 estimate of the infection-to-known-case ratio was  $32602/703=46$  (95% CI  $25470/703=36$  to  
214  $39734/703=57$ ).

215 **Fig 2. Daily new cases of SARS-CoV-2 and the cumulative number of cases in District**  
216 **Srinagar, June-July 2020.**

217

## 218 **Discussion**

219 The results of our study provide a rough estimate of the prevalence of IgG antibodies against  
220 SARS-CoV-2 in District Srinagar. Nearly 3.6% of the population showed evidence of recent  
221 SARS-CoV-2 infection. A large proportion of the population is, thus, still susceptible to the  
222 infection. Approximately three months after reporting the first COVID-19 case, the epidemic  
223 appears to be in the initial stages, and more cases of COVID-19 are expected. The number of  
224 confirmed cases of SARS-CoV-2 infection has been on the increase ever since we completed our  
225 study (Fig 2).

226 A large proportion of infections remain unknown. For every RT-PCR confirmed case, there are  
227 about 46 infections in the population. This figure is higher than that reported from Switzerland  
228 [15]. Interestingly, only 28% of participants in our study with COVID-19 like symptoms were  
229 tested by RT-PCR (Table 2). Robust mechanisms for testing of COVID-19 suspects need to be  
230 developed and implemented to decrease the number of unknown infections. Of the 111  
231 participants who tested positive for SARS-CoV-2 specific IgG, 97 did not report any history of  
232 COVID-19 like symptoms. This finding is compatible with what we know about SARS-CoV-2  
233 infections – a majority of them remain asymptomatic [6,7].

234 Several seroprevalence studies conducted across the world have reported prevalence ranging  
235 from 1% in California to 23% in Delhi [15–22]. The prevalence estimates depend on the stage of  
236 the epidemic in the area at the time of the study and the accuracy of the antibody detection test  
237 used.

238 We used CMIA to detect SARS-CoV-2 specific IgG antibodies. CMIA-based IgG tests have  
239 high sensitivity and specificity for the detection of SARS-CoV-2 infection when the samples  
240 have been taken two weeks after the onset of symptoms [9,23–28]. There is, however, a  
241 possibility of cross-reaction with human endemic coronaviruses, which can lead to false-positive  
242 results making a diagnosis of SARS-CoV-2 infection by antibody detection less specific  
243 [9,23,29].

244 IgG antibodies appear, on an average, 10-11 days after symptoms [15] or two weeks after  
245 infection and are maintained at a high level for an extended period [24,25]. Immediately after  
246 infection, the IgG titers are negative and thus do not help in the diagnosis of the infection in the  
247 early stage. A combination of IgM and IgG antibody tests is more helpful [27]. Detection of  
248 infection by the use of SARS-CoV-2 specific IgM and IgG antibodies has several advantages. As



249 compared to RT-PCR based detection of infection, the antibody-based tests are cheaper and  
250 faster. They also pose less danger of infection for health workers since patients may disperse the  
251 virus during respiratory sampling. Also, blood samples show reduced heterogeneity compared to  
252 respiratory specimens [23]. Besides, the presence of IgG antibodies gives a clue to the presence  
253 of humoral immunity to SARS-CoV-2. However, both B and T cells may provide immune-  
254 mediated protection to viral infection [26].

255 We did not find any significant difference in seroprevalence among males and females (OR 1.2,  
256 95% CI 0.8-1.8) (Table 4). Similar findings have been reported elsewhere in the literature  
257 [17,30]. People 30-69 years of age had a 2-3 times higher odds of the presence of SARS-CoV-2  
258 specific IgG antibodies as compared to the young (<30 years) (Table 4). The lower  
259 seroprevalence in the old ( $\geq 70$  years) points to the success of social distancing measures adopted  
260 by families, especially in the context of the elderly population, something the local health  
261 authorities have been stressing upon given the higher chances of more severe disease among the  
262 elderly. However, the possibility of immunosenescence among older adults cannot be ruled out  
263 and needs further investigation [31].

264 The presence of ILI symptoms in the recent past was the factor most strongly associated with the  
265 presence of SARS-CoV-2 specific IgG antibodies. People with a recent history of ILI symptoms  
266 had a 3.7 times higher chance of showing evidence of SARS-CoV-2 infection as compared to  
267 those without such history. Another factor significantly related to evidence of SARS-CoV-2  
268 infection was placement under quarantine. During the first few months of the epidemic in the  
269 District, the authorities placed all SARS-CoV-2 suspects and their close contacts under  
270 ‘administrative quarantine’ at a designated place. There is a possibility that infection in such  
271 cases could be because of their contact with the primary suspect or contact during their stay at

272 the quarantine facility. Nevertheless, having been under quarantine almost doubled the odds of  
273 SARS-CoV-2 infection as compared to those who did not need such quarantine.

## 274 **Limitations**

275 The selection of study participants was not completely random, and this could have led to an  
276 overestimation of the seroprevalence estimates. A random population-based selection of  
277 participants was not feasible owing to the lockdown and human resource constraints in an  
278 already over-burdened healthcare system. We, hopefully, reduced the bias by providing age- and  
279 gender-standardized estimates, but could not nullify or estimate the bias. The low prevalence of  
280 SARS-CoV-2 in our setting and the possibility of false-positive results may inflate our  
281 prevalence estimates. We provide test-performance adjusted estimates of the number of  
282 infections in addition to age- and gender- standardization to reduce such bias. Detection of  
283 SARS-CoV-2 specific IgM antibodies and simultaneous RT-PCR could have provided a better  
284 estimate of the current infection rate.

## 285 **Conclusions**

286 Our study provides estimates of SARS-CoV-2 infection in District Srinagar. The findings of our  
287 study suggest that there are many people with unknown infection in the community. For every  
288 known case, there are approximately 46 unknown infections. A sizeable number of symptomatic  
289 individuals do not receive RT-PCR testing for early diagnosis. The case-detection and contact-  
290 testing exercise should be intensified to allow the detection of unknown infections in the  
291 community. The study findings further suggest that a large proportion of the population is still  
292 susceptible to SARS-CoV-2 infection, and the number of cases may increase. There is a need to

293 ensure the availability of treatment facilities in hospitals across the District. Infection  
294 surveillance measures need to be developed to devise informed public health measures.

## 295 **Acknowledgments**

296 We are grateful to Prof. Samia Rashid, Principal, Government Medical College, Srinagar; Shahid  
297 Choudhary, District Commissioner, Srinagar; the Department of Biochemistry, Government  
298 Medical College, Srinagar; Directorate of Health Services, Kashmir; Chief Medical Officer,  
299 Srinagar; all Block Medical Officers and Zonal Medical Officers of District Srinagar; all  
300 healthcare workers, and interns involved in this study. We thank the study participants for  
301 understanding the importance of this study and giving their time and consent for participation.

## 302 **References**

- 303 1. Naming the coronavirus disease (COVID-19) and the virus that causes it. [cited 29th  
304 August 2020]. Available: [https://www.who.int/emergencies/diseases/novel-coronavirus-](https://www.who.int/emergencies/diseases/novel-coronavirus-2019/technical-guidance/naming-the-coronavirus-disease-(covid-2019)-and-the-virus-that-causes-it)  
305 [2019/technical-guidance/naming-the-coronavirus-disease-\(covid-2019\)-and-the-virus-that-](https://www.who.int/emergencies/diseases/novel-coronavirus-2019/technical-guidance/naming-the-coronavirus-disease-(covid-2019)-and-the-virus-that-causes-it)  
306 [causes-it](https://www.who.int/emergencies/diseases/novel-coronavirus-2019/technical-guidance/naming-the-coronavirus-disease-(covid-2019)-and-the-virus-that-causes-it)
- 307 2. Coronavirus disease 2019 (COVID-19) Situation Report – 53. 2020. Available:  
308 [https://www.who.int/docs/default-source/coronaviruse/situation-reports/20200313-sitrep-](https://www.who.int/docs/default-source/coronaviruse/situation-reports/20200313-sitrep-53-covid-19.pdf?sfvrsn=adb3f72_2)  
309 [53-covid-19.pdf?sfvrsn=adb3f72\\_2](https://www.who.int/docs/default-source/coronaviruse/situation-reports/20200313-sitrep-53-covid-19.pdf?sfvrsn=adb3f72_2)
- 310 3. Novel Coronavirus(2019-nCoV) Situation Report - 11. 2020. Available:  
311 [https://www.who.int/docs/default-source/coronaviruse/situation-reports/20200131-sitrep-](https://www.who.int/docs/default-source/coronaviruse/situation-reports/20200131-sitrep-11-ncov.pdf?sfvrsn=de7c0f7_4)  
312 [11-ncov.pdf?sfvrsn=de7c0f7\\_4](https://www.who.int/docs/default-source/coronaviruse/situation-reports/20200131-sitrep-11-ncov.pdf?sfvrsn=de7c0f7_4)

- 313 4. Coronavirus disease (COVID-19) Situation Report-193. 2020. Available:  
314 [https://www.who.int/docs/default-source/coronaviruse/situation-reports/20200731-covid-](https://www.who.int/docs/default-source/coronaviruse/situation-reports/20200731-covid-19-sitrep-193.pdf?sfvrsn=42a0221d_4)  
315 [19-sitrep-193.pdf?sfvrsn=42a0221d\\_4](https://www.who.int/docs/default-source/coronaviruse/situation-reports/20200731-covid-19-sitrep-193.pdf?sfvrsn=42a0221d_4)
- 316 5. J&K Admn declares lockdown; essential services to continue : The Tribune India. [cited  
317 29th August 2020]. Available: [https://www.tribuneindia.com/news/j-k/jk-admn-declares-](https://www.tribuneindia.com/news/j-k/jk-admn-declares-lockdown-essential-services-to-continue-59653)  
318 [lockdown-essential-services-to-continue-59653](https://www.tribuneindia.com/news/j-k/jk-admn-declares-lockdown-essential-services-to-continue-59653)
- 319 6. Gao Z, Xu Y, Sun C, Wang X, Guo Y, Qiu S, et al. A systematic review of asymptomatic  
320 infections with COVID-19. *Journal of Microbiology, Immunology and Infection*. Elsevier  
321 Ltd; 2020. doi:10.1016/j.jmii.2020.05.001
- 322 7. Moghadas SM, Fitzpatrick MC, Sah P, Pandey A, Shoukat A, Singer BH, et al. The  
323 implications of silent transmission for the control of COVID-19 outbreaks. *Proc Natl*  
324 *Acad Sci U S A*. 2020;117: 17513–17515. doi:10.1073/pnas.2008373117
- 325 8. Epicollect5 - Free and easy-to-use mobile data-gathering platform. [cited 29th August  
326 2020]. Available: <https://five.epicollect.net/>
- 327 9. SARS-CoV-2 Immunoassay | Abbott Core Laboratory. [cited 29th August 2020].  
328 Available: [https://www.corelaboratory.abbott/us/en/offerings/segments/infectious-](https://www.corelaboratory.abbott/us/en/offerings/segments/infectious-disease/sars-cov-2)  
329 [disease/sars-cov-2](https://www.corelaboratory.abbott/us/en/offerings/segments/infectious-disease/sars-cov-2)
- 330 10. Bryan A, Pepper G, Wener MH, Fink SL, Morishima C, Chaudhary A, et al. Performance  
331 Characteristics of the Abbott Architect SARS-CoV-2 IgG Assay and Seroprevalence in  
332 Boise, Idaho. *J Clin Microbiol*. 2020;58. doi:10.1128/JCM.00941-20
- 333 11. Census of India Website : Office of the Registrar General & Census Commissioner, India.

- 334 2020. Available: [https://censusindia.gov.in/vital\\_statistics/SRS\\_Bulletins/SRS](https://censusindia.gov.in/vital_statistics/SRS_Bulletins/SRS)  
335 [Bulletin\\_2018.pdf](#)
- 336 12. Census of India Website : Office of the Registrar General & Census Commissioner, India.  
337 District Census HandBook - JAMMU & KASHMIR. 2020. Available:  
338 [https://censusindia.gov.in/2011census/dchb/DCHB\\_A/01/0110\\_PART\\_A\\_DCHB\\_SRINA](https://censusindia.gov.in/2011census/dchb/DCHB_A/01/0110_PART_A_DCHB_SRINA)  
339 [GAR.pdf](#)
- 340 13. Census of India Website : Office of the Registrar General & Census Commissioner, India.  
341 2020. Available:  
342 [https://www.censusindia.gov.in/vital\\_statistics/SRS\\_Bulletins/Bulletins.html](https://www.censusindia.gov.in/vital_statistics/SRS_Bulletins/Bulletins.html)
- 343 14. Sempos CT, Tian L. Adjusting Coronavirus Prevalence Estimates for Laboratory Test Kit  
344 Error. *Am J Epidemiol.* 2020 [cited 29th August 2020]. doi:10.1093/aje/kwaa174
- 345 15. Stringhini S, Wisniak A, Piumatti G, Azman AS, Lauer SA, Baysson H, et al.  
346 seroprevalence of anti-SARS-CoV-2 IgG antibodies in Geneva, Switzerland (SEROCoV-  
347 POP): a population-based study. *Lancet.* 2020;396: 313–319. doi:10.1016/S0140-  
348 6736(20)31304-0
- 349 16. Havers FP, Reed C, Lim T, Montgomery JM, Klena JD, Hall AJ, et al. Seroprevalence of  
350 Antibodies to SARS-CoV-2 in 10 Sites in the United States, March 23-May 12, 2020.  
351 *JAMA Intern Med.* 2020 [cited 29th August 2020]. doi:10.1001/jamainternmed.2020.4130
- 352 17. Pollán M, Pérez-Gómez B, Pastor-Barriuso R, Oteo J, Hernán MA, Pérez-Olmeda M, et  
353 al. Prevalence of SARS-CoV-2 in Spain (ENE-COVID): a nationwide, population-based  
354 seroepidemiological study. *Lancet.* 2020;396. doi:10.1016/S0140-6736(20)31483-5

- 355 18. Shakiba M, Hashemi Nazari SS, Mehrabian F, Rezvani SM, Ghasempour Z, Heidarzadeh  
356 A. Seroprevalence of COVID-19 virus infection in Guilan province, Iran. medRxiv. Cold  
357 Spring Harbor Laboratory Press; 2020 May. doi:10.1101/2020.04.26.20079244
- 358 19. Doi A, Iwata K, Kuroda H, Hasuike T, Nasu S, Kanda A, et al. Estimation of  
359 seroprevalence of novel coronavirus disease (COVID-19) using preserved serum at an  
360 outpatient setting in Kobe, Japan: A cross-sectional study. Infectious Diseases (except  
361 HIV/AIDS); 2020 Aug. Available:  
362 <http://medrxiv.org/lookup/doi/10.1101/2020.04.26.20079822>
- 363 20. Snoeck CJ, Vaillant M, Abdelrahman T, Satagopam VP, Turner JD, Beaumont K, et al.  
364 Prevalence of SARS-CoV-2 infection in the Luxembourgish population the CON-VINCE  
365 study. Medrxiv. 2020; 2020.05.11.20092916. doi:10.1101/2020.05.11.20092916
- 366 21. Sood N, Simon P, Ebner P, Eichner D, Reynolds J, Bendavid E, et al. Seroprevalence of  
367 SARS-CoV-2-Specific Antibodies among Adults in Los Angeles County, California, on  
368 April 10-11, 2020. JAMA - Journal of the American Medical Association. American  
369 Medical Association; 2020. doi:10.1001/jama.2020.8279
- 370 22. Sero-prevalence study conducted by National Center for Disease Control NCDC,  
371 MoHFW, in Delhi, June 2020. 2020. Available:  
372 <http://pib.gov.in/Pressreleaseshare.aspx?PRID=1640137>
- 373 23. Kontou PI, Braliou GG, Dimou NL, Nikolopoulos G, Bagos PG. Antibody tests in  
374 detecting SARS-CoV-2 infection: A meta-analysis. Diagnostics. 2020;10.  
375 doi:10.3390/diagnostics10050319
- 376 24. Bundschuh C, Egger M, Wiesinger K, Gabriel C, Clodi M, Mueller T, et al. Evaluation of

- 377 the EDI enzyme linked immunosorbent assays for the detection of SARS-CoV-2 IgM and  
378 IgG antibodies in human plasma. *Clin Chim Acta*. 2020;509: 79–82.  
379 doi:10.1016/j.cca.2020.05.047
- 380 25. Hou H, Wang T, Zhang B, Luo Y, Mao L, Wang F, et al. Detection of IgM and IgG  
381 antibodies in patients with coronavirus disease 2019. *Clin Transl Immunol*. 2020;9.  
382 doi:10.1002/cti2.1136
- 383 26. Ni L, Ye F, Cheng ML, Feng Y, Deng YQ, Zhao H, et al. Detection of SARS-CoV-2-  
384 Specific Humoral and Cellular Immunity in COVID-19 Convalescent Individuals.  
385 *Immunity*. 2020;52: 971-977.e3. doi:10.1016/j.immuni.2020.04.023
- 386 27. Xie J, Ding C, Li J, Wang Y, Guo H, Lu Z, et al. Characteristics of Patients with  
387 Coronavirus Disease (COVID-19) Confirmed using an IgM-IgG Antibody Test. *J Med*  
388 *Virol*. 2020 [cited 29 Aug 2020]. doi:10.1002/jmv.25930
- 389 28. Nuccetelli M, Pieri M, Grelli S, Ciotti M, Miano R, Andreoni M, et al. SARS-CoV-2  
390 infection serology: a useful tool to overcome lockdown? *Cell Death Discov*. 2020;6.  
391 doi:10.1038/s41420-020-0275-2
- 392 29. Okba NMA, Müller MA, Li W, Wang C, Geurtsvankessel CH, Corman VM, et al. Severe  
393 Acute Respiratory Syndrome Coronavirus 2-Specific Antibody Responses in Coronavirus  
394 Disease Patients. *Emerg Infect Dis*. 2020;26: 1478–1488. doi:10.3201/eid2607.200841
- 395 30. Zeng F, Dai C, Cai P, Wang J, Xu L, Li J, et al. A comparison study of SARS-CoV-2 IgG  
396 antibody between male and female COVID-19 patients: A possible reason underlying  
397 different outcome between sex. *J Med Virol*. 2020 [cited 29 Aug 2020].  
398 doi:10.1002/jmv.25989

399 31. Pawelec G, Weng NP. Can an effective SARS-CoV-2 vaccine be developed for the older  
400 population? Immunity and Ageing. BioMed Central Ltd.; 2020. doi:10.1186/s12979-020-  
401 00180-2

402

## 403 **Supporting information captions**

404 **S1 Data. List of hospitals across District Srinagar.**

405 **S1 Table. Age and gender distribution of the population in District Srinagar and the**  
406 **estimated population in 2020.**

407 **S2 Table. Estimated number of infections in District Srinagar.**

408 **S3 Table. Age- and gender-standardized seroprevalence.**



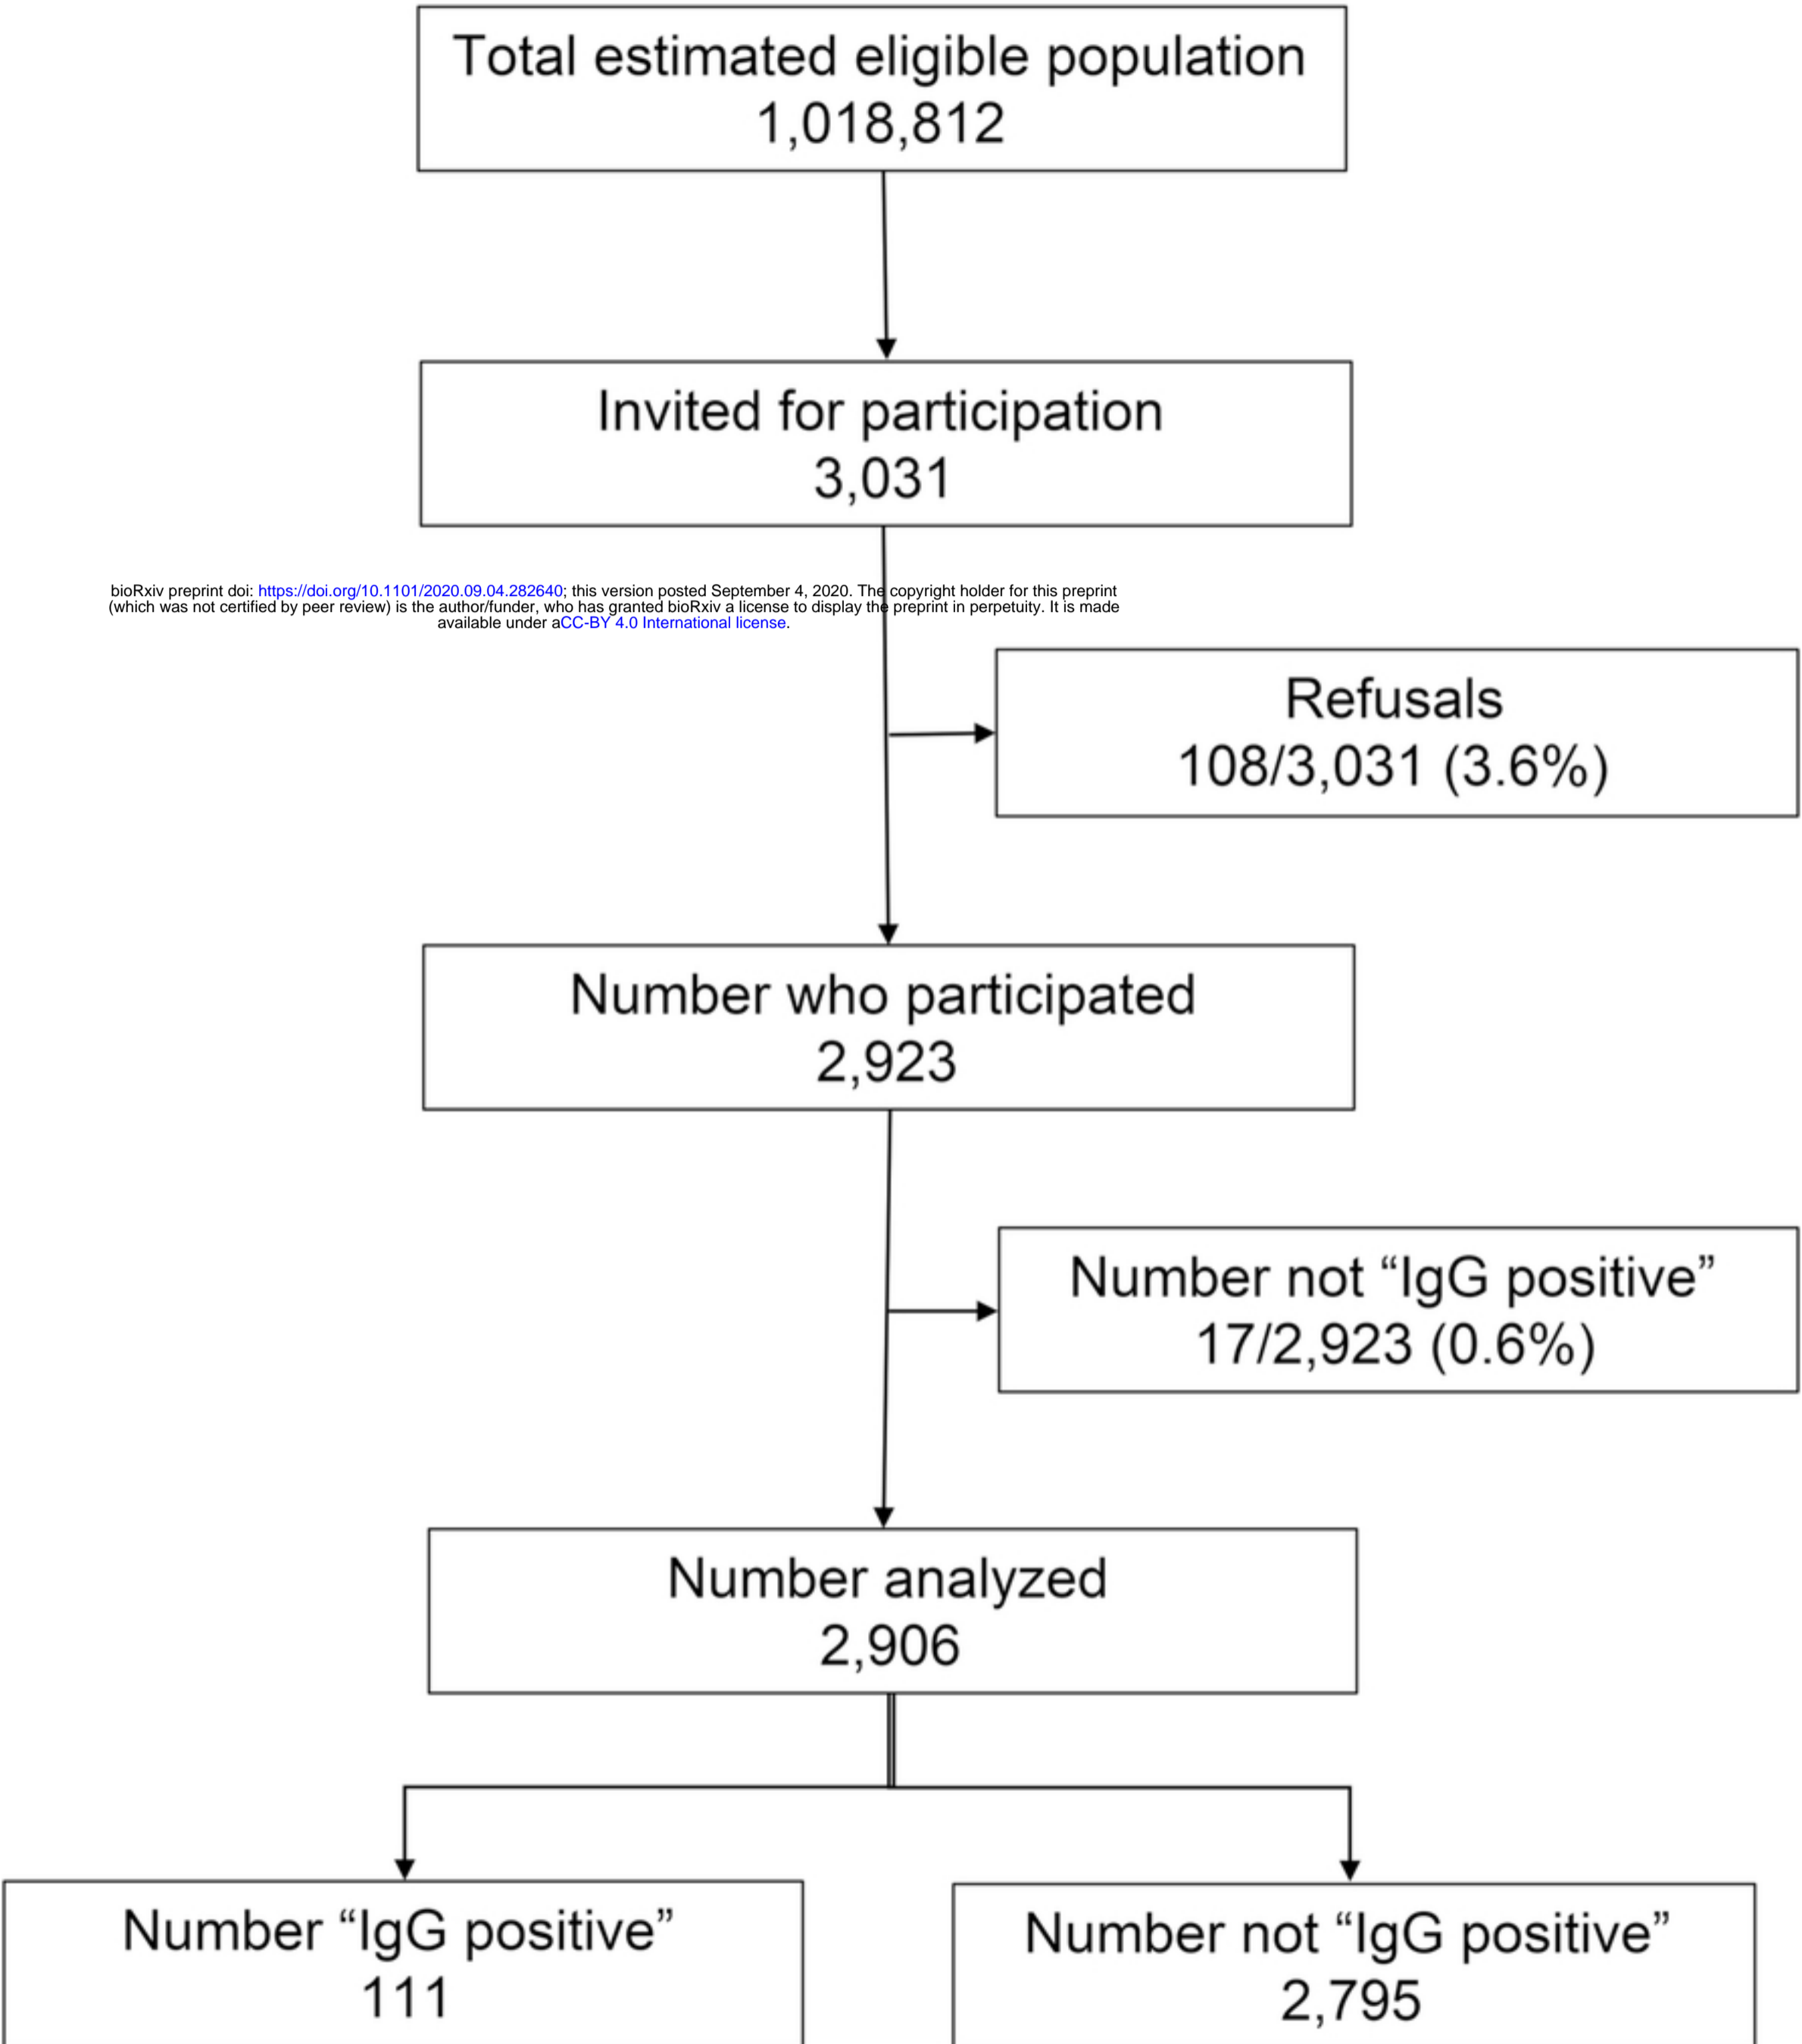

Fig 1

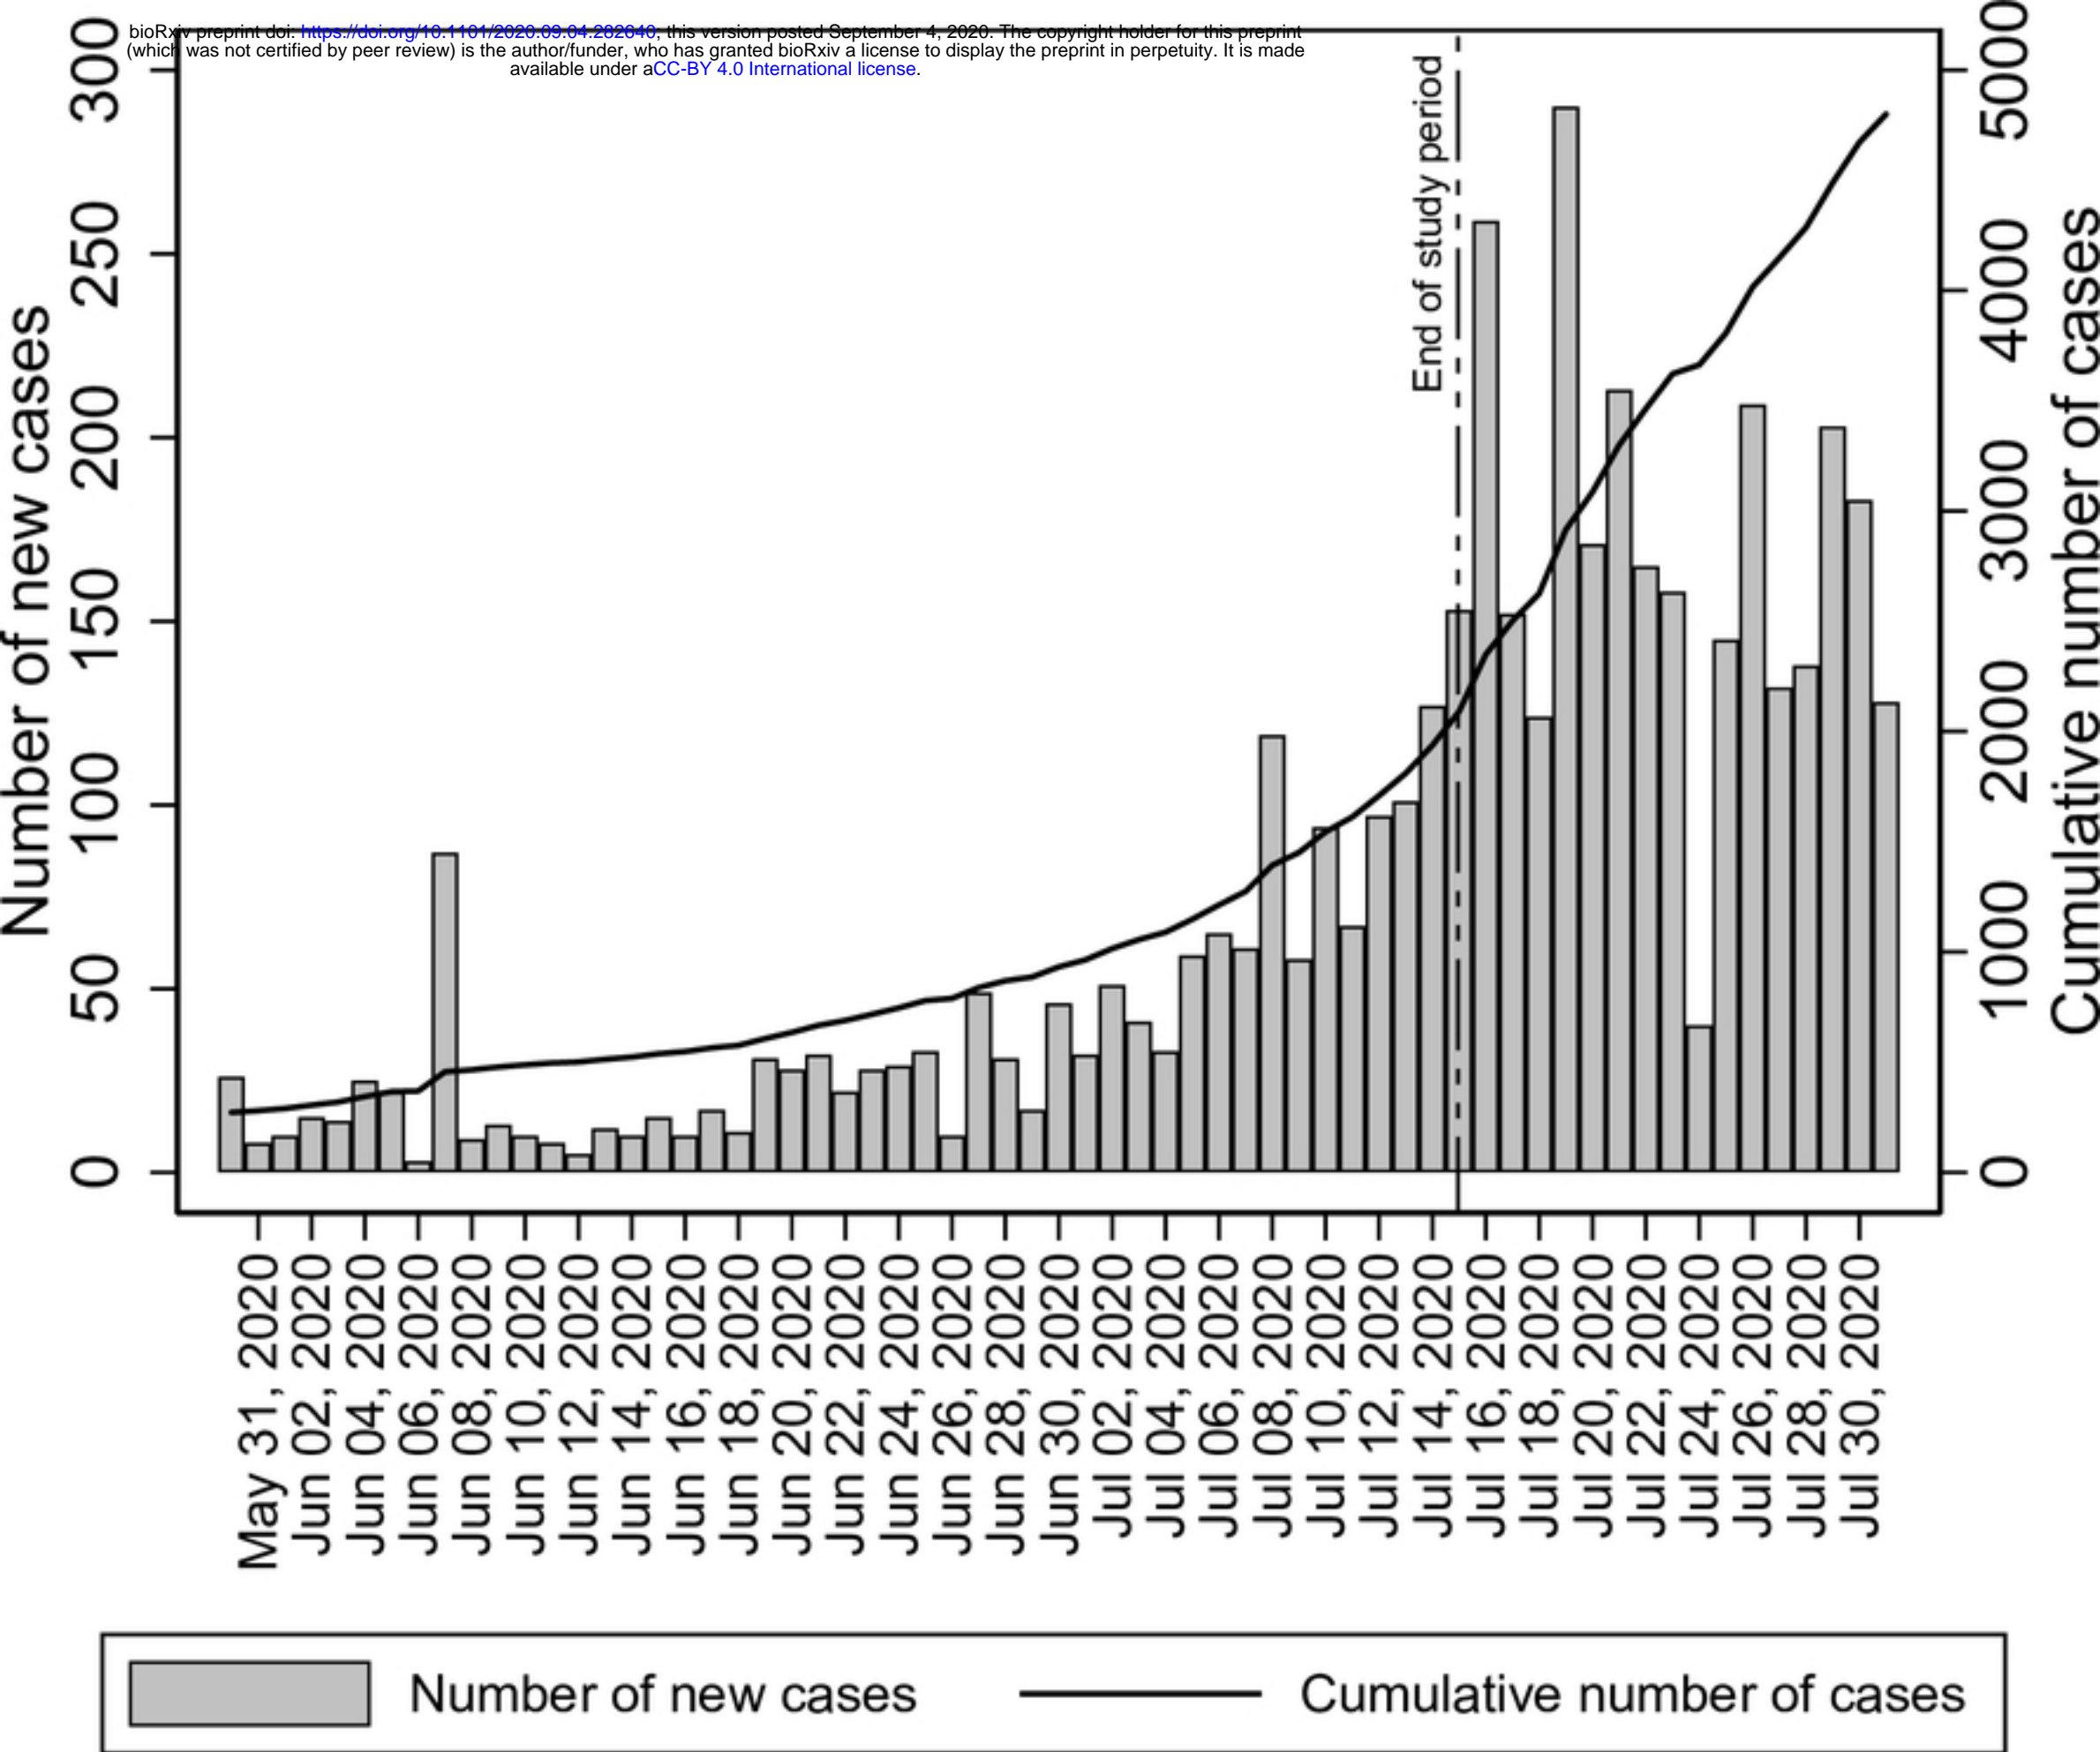

Fig 2
